# Supplementary material
Source: PubMed Central journal article supplement (PMC3373245)

Figure. S1

A.

Notch1 mRNA

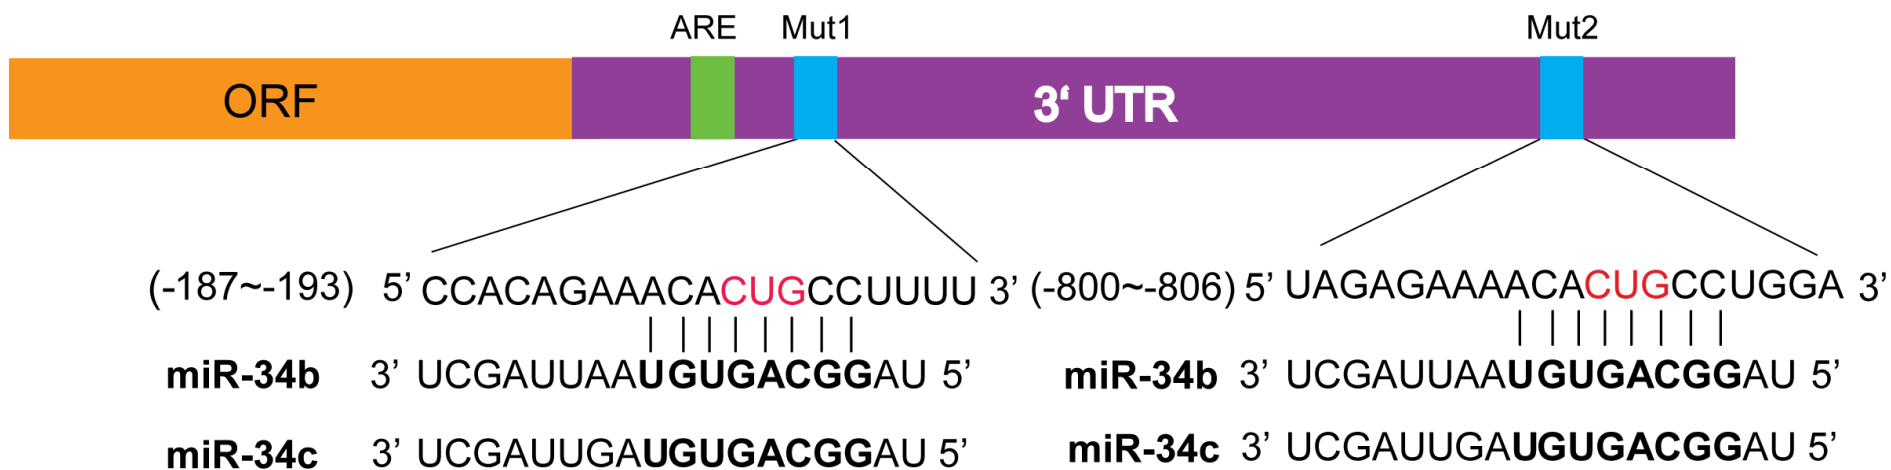

B.

Notch1 Western

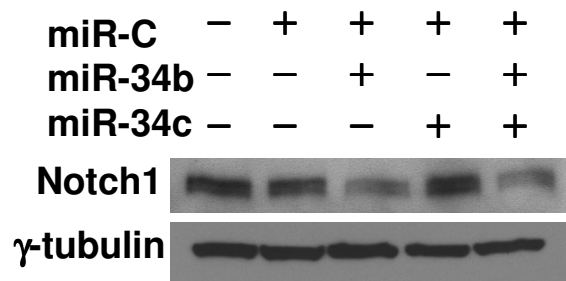

C.

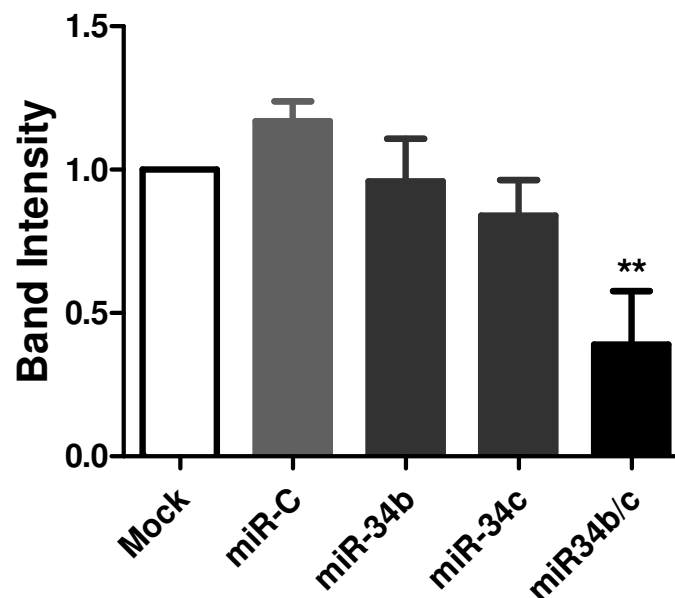

Figure. S2

A.

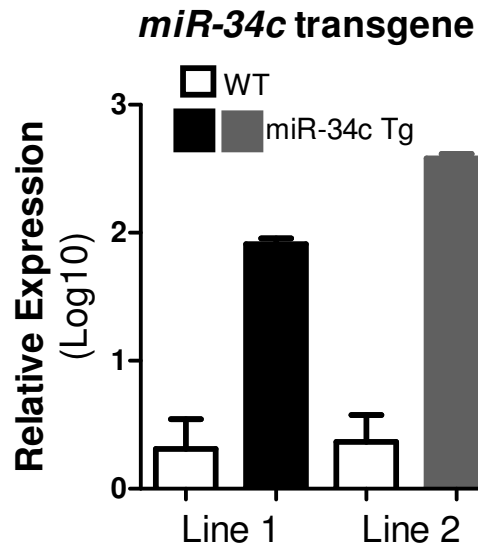

B.

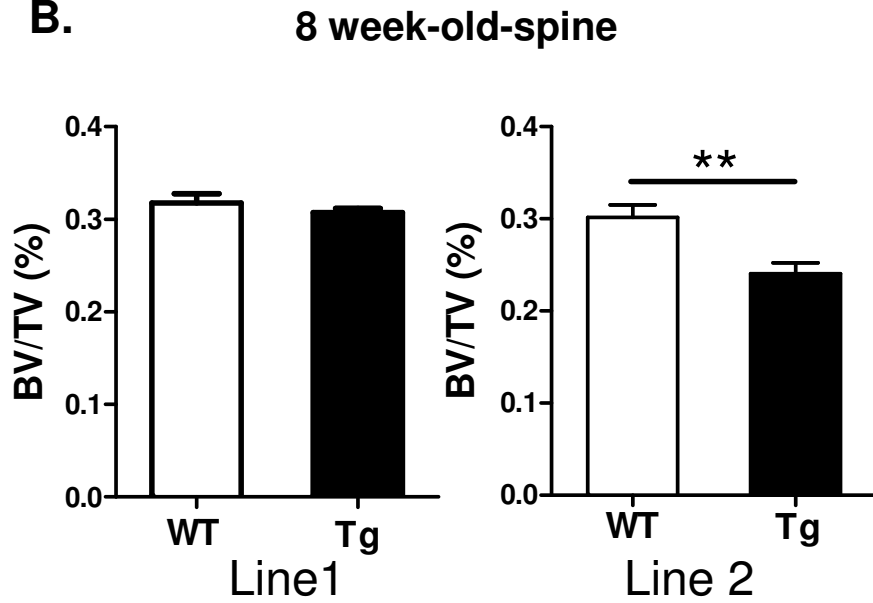

C.

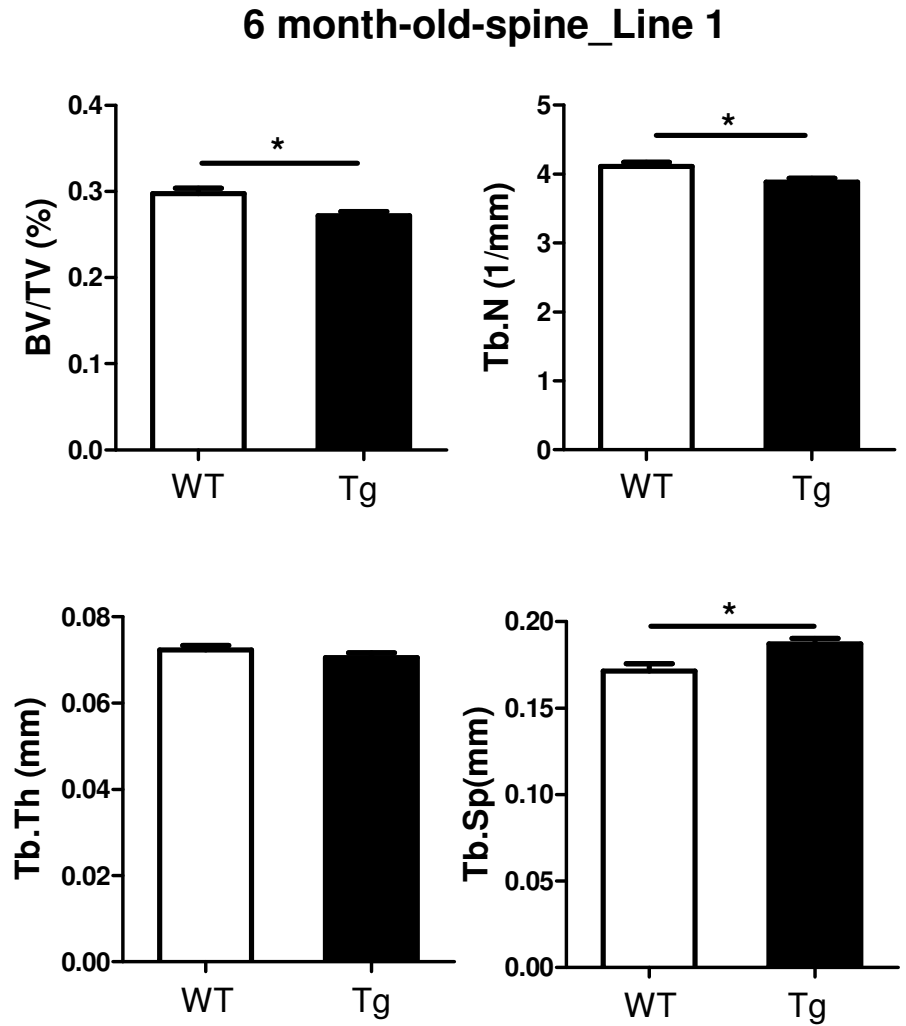

Figure. S3

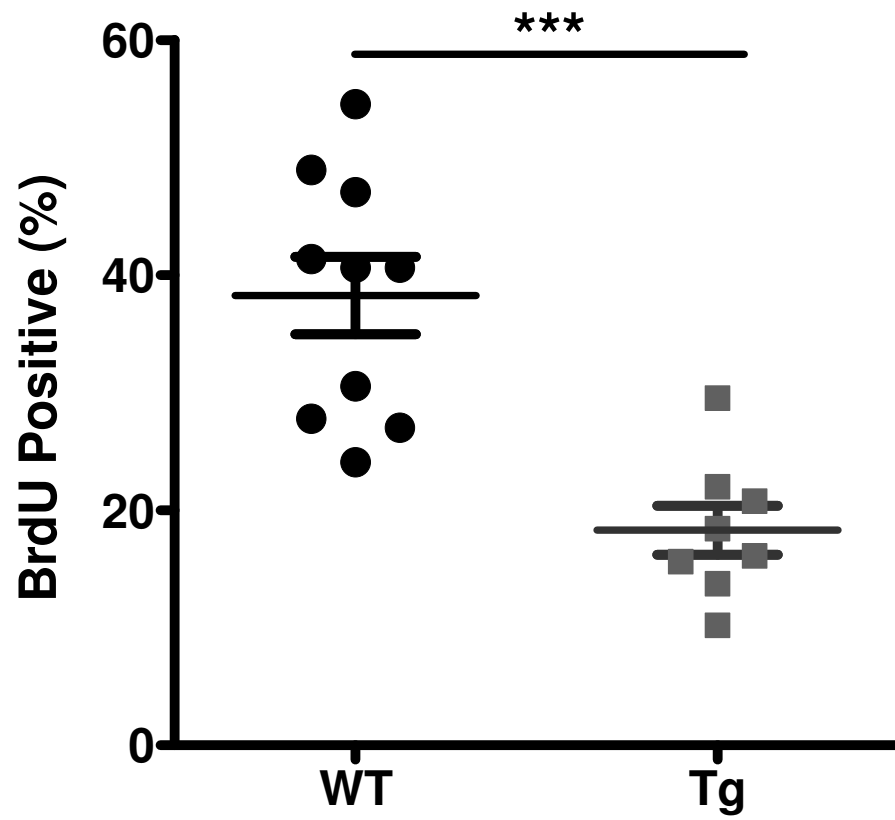

Figure. S4

**A.** *Notch2* 3'UTR 5' ...AGAUGA**AGA**AAGACAA**CACUGCCA**...  
                                  ||                          |||||||  
miR-34c 3' CGUUAG**UC**GAUUGAU**GUGACGGA**

**B.** *Jag1* 3'UTR 5' ...AUUUGCCG**UAG**AGUA**CACUGCCU**...  
                                  ||                          |||||||  
miR-34c 3' CGUUAGUCG**AU**UGAU-**GUGACGGA**

**C. Notch direct target genes**

| Gene        | P value     |
|-------------|-------------|
| <i>Hey1</i> | 0.016294928 |
| <i>Hes2</i> | 0.000349109 |
| <i>Hes5</i> | 4.87794E-05 |

Figure. S4

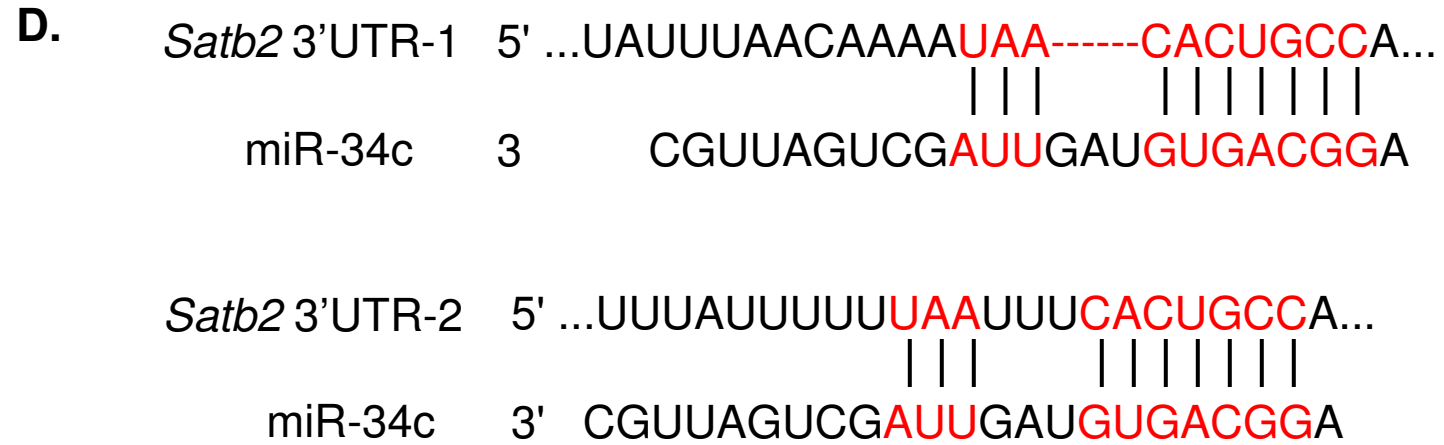

Supplement: supp_dds129_dds129supp_figs.pdf [file supp_dds129_dds129supp_figs.pdf]
